# Supplementary material for: Short-term dose and duration-dependent glucocorticoid risk for cardiovascular events in glucocorticoid-naive patients with rheumatoid arthritis
Source: HighWire-hosted journal article supplement (doi:10.1136/annrheumdis-2021-220577), 2021-07-02
Supplement: annrheumdis-2021-220577supp001_data_supplement.pdf [file annrheumdis-2021-220577supp001_data_supplement.pdf]

## **Supplemental Appendix**

**June 21, 2021**

### **Section 1. Title Page**

#### **Dose and duration-dependent corticosteroid risk for cardiovascular events in corticosteroid-naïve patients with rheumatoid arthritis**

Anthony J. Ocon, MD, PhD<sup>1</sup>; George Reed, PhD<sup>2,3</sup>; Dimitrios Pappas, MD<sup>3,4</sup>; Jeff Curtis, MD, MS, MPH<sup>5</sup>; Joel M. Kremer, MD<sup>3,6</sup>

1. Department of Medicine, Division of Allergy, Immunology, and Rheumatology, University of Rochester Medical Center, Rochester, NY, USA

2. Department of Medicine, Division of Preventative and Behavioral Medicine, University of Massachusetts Medical School, Worcester, MA

3. The Corrona Research Foundation, LLC, Waltham, MA, USA

4. Department of Medicine, Division of Rheumatology, Columbia University, New York, NY, USA

5. Department of Medicine, Division of Clinical Immunology and Rheumatology, University of Alabama at Birmingham, Birmingham, AL, USA

6. Department of Medicine, Division of Rheumatology, Albany Medical College; The Center for Rheumatology, Albany, NY, USA

Section 2. Table of Contents

|                                                                          |         |
|--------------------------------------------------------------------------|---------|
| 1. Title page                                                            | Page: 1 |
| 2. Table of contents                                                     | Page: 2 |
| 3. Methods of calculating cumulative prednisone dose/duration; eFigure 1 | Page: 3 |
| 4. Event collection protocol for CorEvitas (formerly Corrona); eFigure 2 | Page: 4 |
| 5. Absolute number of patients for each risk assessment, eTable 1        | Page: 5 |
| 6. Sensitivity analysis: Exclusion of VTE as CVE; eTable 2               | Page: 6 |
| 7. Sensitivity analysis: Exclusion of patients with prior CVE, eTable 3  | Page: 7 |
| 8. Sensitivity analysis: Exclusion of “Other” CVE, eTable 4              | Page: 8 |

Section 3. Methods of calculating cumulative prednisone dose/duration of use

Time was divided into days to cover all events and changes of dose or duration of use across all patients. Prednisone dose and usage were updated at each visit for a patient. The assumption was made that a patient was on the prior dose with continuous use until the next visit unless the patient or physician reported a specific date of dose change or cessation of use.

As a time-varying analysis, for each time point after the index date (enrollment), we computed cumulative dose or duration of use over the preceding 6-months or 1-year. This is illustrated in eFigure 1A with an example patient and shows how the preceding 6-month cumulative dose is updated in a time-varying manner. Cumulative dose and duration of use were divided into equivalent quartiles for analysis.

For any given series of days, eFigure 1B illustrated the computation of cumulative total dose or duration of use. The cumulative total dose (or duration of use) was calculated as the area under the dose curve for the preceding 6-months or 1-year interval.

Appendix eFigure 1. Computational model for total prednisone dose and duration.

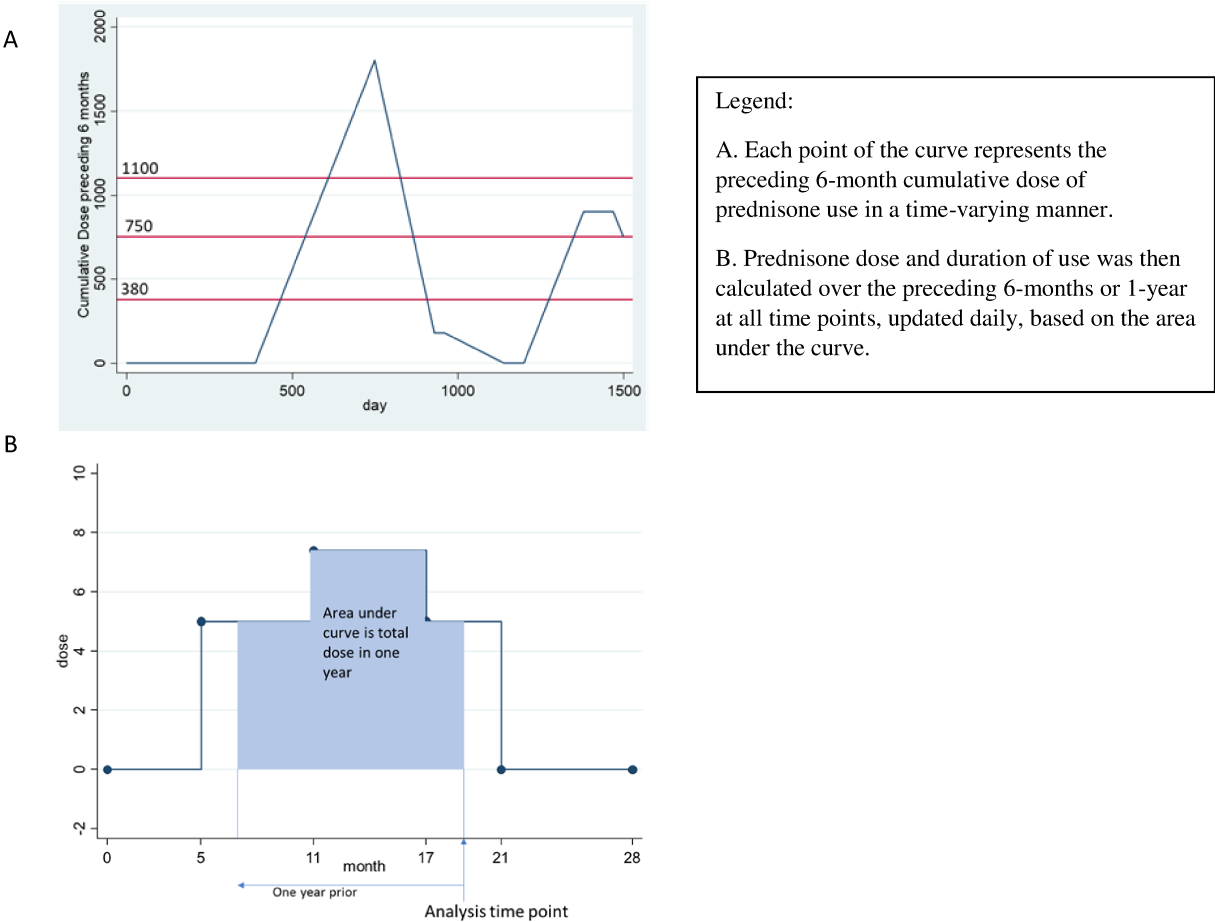

#### Section 4. Event collection protocol for CorEvitas (formerly Corrona) registry

The supplemental eFigure 2 below illustrates the collection of targeted adverse events (TAEs) in the CorEvitas (formerly Corrona) registry. All outcomes of interest are TAEs within CorEvitas.

Primary analysis of events was operationalized as follows. The registry used all events reported on physician forms except for events that were 'not confirmed' by the TAE form. Approximately 90% of reported events are validated with a TAE. Of the remaining 10%, approximately 4% were later ruled out and converted to "not an event"; 5-6% were incomplete in the system pending additional site follow-up/TAE completion.

#### Appendix eFigure 2. Targeted Adverse Events

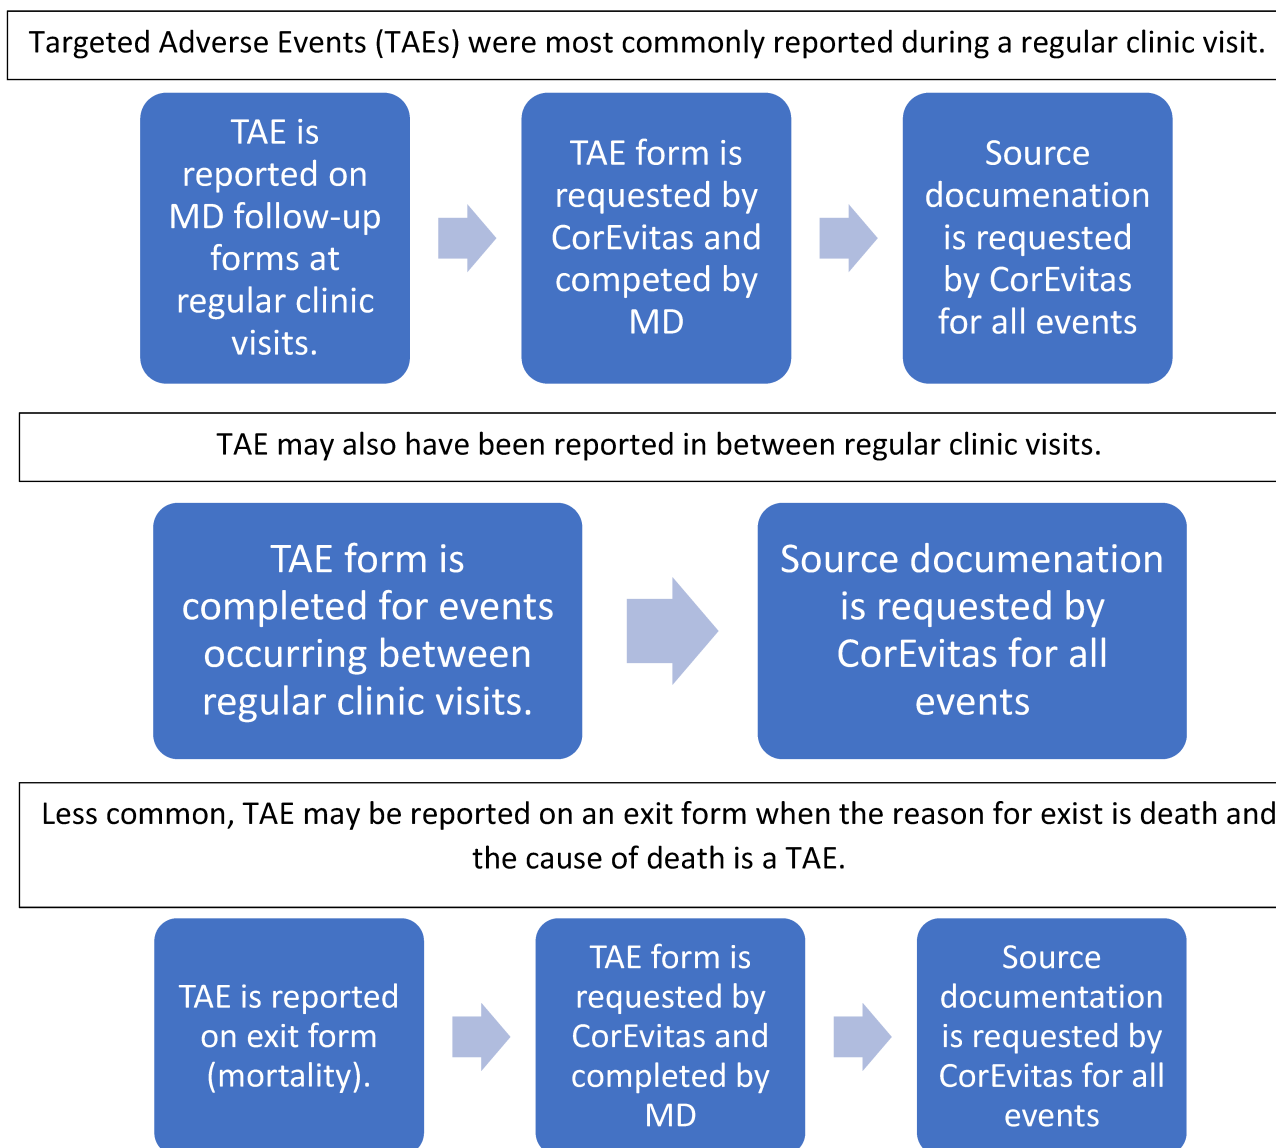

## Section 5. Absolute Number of Patients For Each Risk Assessment

Note that patients may contribute to more than one category over time due to the time varying analysis. Thus, the total number of patients will be greater than the number included in the study.

**Appendix eTable 1: Patient Counts**

| Daily Dose (mg) †       | Patients contributing |
|-------------------------|-----------------------|
| none                    | 19902                 |
| 1-<5                    | 722                   |
| ≥5-9                    | 1598                  |
| ≥10                     | 1077                  |
| Cumulative Dose (mg) †  |                       |
| Over Preceding 6-Months |                       |
| none                    | 19902                 |
| 1-380                   | 2500                  |
| 381-750                 | 2396                  |
| 751-1100                | 2003                  |
| >1110                   | 1001                  |
| Over Preceding 1-Year   |                       |
| none                    | 19902                 |
| 1-500                   | 2500                  |
| 501-1100                | 2314                  |
| 1101-2100               | 1710                  |
| >2100                   | 919                   |
| Duration of Use (days)  |                       |
| Over Preceding 6-Months |                       |
| none                    | 19902                 |
| 1-80                    | 2500                  |
| 81-160                  | 2440                  |
| 161-181                 | 1864                  |
| >181                    | 1705                  |
| Over Preceding 1-Year   |                       |
| none                    | 19902                 |
| 1-100                   | 2500                  |
| 101-220                 | 2274                  |
| 221-360                 | 1388                  |
| >360                    | 858                   |

## Section 6. Sensitivity analysis: Exclusion of VTE as CVE

## Appendix eTable 2. Unadjusted and adjusted Hazard Ratios after Exclusion of Deep Vein Thrombosis and Pulmonary Embolism as Cardiovascular Events

| Risk for Cardiovascular Events Excluding DVT/PE |                         |                         |                        |                         |
|-------------------------------------------------|-------------------------|-------------------------|------------------------|-------------------------|
| Daily Dose (mg)†                                | Unadjusted Hazard Ratio | 95% Confidence Interval | Adjusted* Hazard Ratio | 95% Confidence Interval |
| none                                            | 1                       | ref                     | 1                      | ref                     |
| 1-<5                                            | 0.96                    | 0.54-1.70               | 0.87                   | 0.49-1.54               |
| ≥5-9                                            | 1.71                    | 1.28-2.29               | 1.50                   | 1.12-2.01               |
| ≥10                                             | 2.03                    | 1.37-3.03               | 1.83                   | 1.23-2.74               |
| Cumulative Dose (mg)†                           | Unadjusted Hazard Ratio | 95% Confidence Interval | Adjusted* Hazard Ratio | 95% Confidence Interval |
| Over Preceding 6-Months                         |                         |                         |                        |                         |
| none                                            | 1                       | ref                     | 1                      | ref                     |
| 1-380                                           | 0.83                    | 0.49-1.41               | 0.78                   | 0.46-1.32               |
| 381-750                                         | 1.14                    | 0.73-1.78               | 1.05                   | 0.67-1.64               |
| 751-1100                                        | 1.62                    | 1.16-2.27               | 1.43                   | 1.02-2.00               |
| >1110                                           | 2.44                    | 1.70-3.50               | 2.19                   | 1.52-3.14               |
| Over Preceding 1-Year                           |                         |                         |                        |                         |
| none                                            | 1                       | ref                     | 1                      | ref                     |
| 1-500                                           | 0.97                    | 0.61-1.55               | 0.92                   | 0.58-1.47               |
| 501-1100                                        | 1.26                    | 0.86-1.83               | 1.17                   | 0.80-1.71               |
| 1101-2100                                       | 1.63                    | 1.17-2.28               | 1.47                   | 1.05-2.07               |
| >2100                                           | 1.95                    | 1.38-2.75               | 1.71                   | 1.20-2.42               |
| Duration of Use (days)                          | Unadjusted Hazard Ratio | 95% Confidence Interval | Adjusted* Hazard Ratio | 95% Confidence Interval |
| Over Preceding 6-Months                         |                         |                         |                        |                         |
| none                                            | 1                       | ref                     | 1                      | ref                     |
| 1-80                                            | 0.56                    | 0.30-1.05               | 0.53                   | 0.28-0.99               |
| 81-160                                          | 1.69                    | 1.18-2.44               | 1.58                   | 1.10-2.28               |
| 160-181                                         | 2.18                    | 1.04-4.59               | 1.98                   | 0.94-4.18               |
| >181                                            | 1.77                    | 1.34-2.34               | 1.54                   | 1.16-2.04               |
| Over Preceding 1-Year                           |                         |                         |                        |                         |
| none                                            | 1                       | ref                     | 1                      | ref                     |
| 1-100                                           | 1.13                    | 0.75-1.72               | 1.08                   | 0.71-1.63               |
| 101-220                                         | 1.48                    | 1.07-2.05               | 1.39                   | 1.00-1.93               |
| 221-360                                         | 0.94                    | 0.55-1.59               | 0.83                   | 0.49-1.42               |
| >360                                            | 2.10                    | 1.53-2.89               | 1.83                   | 1.33-2.51               |

DVT, deep vein thrombosis; PE, pulmonary embolism.

†, prednisone-equivalents

\*adjusted for age, sex, race, duration of RA, history of CV disease, diabetes mellitus, hyperlipidemia, hypertension, statin use, NSAID use, tobacco use, year of enrollment, baseline modified health assessment questionnaire score, CDAI, and cs, b, tsDMARDS use.

## Section 7. Sensitivity analysis: Exclusion of patients with prior CV events

With exclusion of patients who had a history of prior CVE, 829 events occurred. The event rate was 1.34 events per 100 patient-years. The total number of patients was 18,168, with 2300 initiating prednisone.

**Appendix eTable 3. Unadjusted and adjusted Hazard Ratios after exclusion of patients with a history of prior CVE**

| <b>Risk for CVE Excluding Patients with Prior History of CVE</b> |                         |                         |                        |                         |
|------------------------------------------------------------------|-------------------------|-------------------------|------------------------|-------------------------|
| <b>Daily Dose (mg)†</b>                                          | Unadjusted Hazard Ratio | 95% Confidence Interval | Adjusted* Hazard Ratio | 95% Confidence Interval |
| none                                                             | 1                       | ref                     | 1                      | ref                     |
| 1-<5                                                             | 0.93                    | 0.50-1.74               | 0.81                   | 0.43-1.51               |
| ≥5-9                                                             | 1.94                    | 1.44-2.62               | 1.68                   | 1.24-2.27               |
| ≥10                                                              | 2.19                    | 1.43-3.36               | 2.04                   | 1.33-3.14               |
| <b>Cumulative Dose (mg)†</b>                                     | Unadjusted Hazard Ratio | 95% Confidence Interval | Adjusted* Hazard Ratio | 95% Confidence Interval |
| <b>Over Preceding 6-Months</b>                                   |                         |                         |                        |                         |
| none                                                             | 1                       | ref                     | 1                      | ref                     |
| 1-380                                                            | 0.86                    | 0.49-1.53               | 0.81                   | 0.46-1.43               |
| 381-750                                                          | 1.34                    | 0.86-2.09               | 1.20                   | 0.77-1.87               |
| 751-1100                                                         | 1.79                    | 1.27-2.54               | 1.57                   | 1.11-2.22               |
| >1110                                                            | 2.38                    | 1.60-3.55               | 2.19                   | 1.46-3.28               |
| <b>Over Preceding 1-Year</b>                                     |                         |                         |                        |                         |
| none                                                             | 1                       | ref                     | 1                      | ref                     |
| 1-500                                                            | 0.98                    | 0.59-1.64               | 0.92                   | 0.51-1.53               |
| 501-1100                                                         | 1.44                    | 0.98-2.12               | 1.35                   | 0.91-1.98               |
| 1101-2100                                                        | 1.60                    | 1.11-2.31               | 1.44                   | 0.99-2.07               |
| >2100                                                            | 2.23                    | 1.57-3.18               | 1.98                   | 1.38-2.82               |
| <b>Duration of Use (days)</b>                                    | Unadjusted Hazard Ratio | 95% Confidence Interval | Adjusted* Hazard Ratio | 95% Confidence Interval |
| <b>Over Preceding 6-Months</b>                                   |                         |                         |                        |                         |
| none                                                             | 1                       | ref                     | 1                      | ref                     |
| 1-80                                                             | 0.75                    | 0.42-1.36               | 0.71                   | 0.39-1.29               |
| 81-160                                                           | 1.76                    | 1.19-2.60               | 1.64                   | 1.11-2.43               |
| 160-181                                                          | 1.47                    | 0.55-3.92               | 1.34                   | 0.50-3.61               |
| >181                                                             | 1.92                    | 1.44-2.57               | 1.65                   | 1.23-2.21               |
| <b>Over Preceding 1-Year</b>                                     |                         |                         |                        |                         |
| none                                                             | 1                       | ref                     | 1                      | ref                     |
| 1-100                                                            | 1.14                    | 0.73-1.81               | 1.09                   | 0.69-1.72               |
| 101-220                                                          | 1.63                    | 1.16-2.30               | 1.54                   | 1.09-2.17               |
| 221-360                                                          | 1.03                    | 0.60-1.79               | 0.91                   | 0.54-1.58               |
| >360                                                             | 2.26                    | 1.62-3.15               | 1.94                   | 1.39-2.71               |

†, prednisone-equivalents

\*adjusted for age, sex, race, duration of RA, history of CV disease, diabetes mellitus, hyperlipidemia, hypertension, statin use, NSAID use, tobacco use, year of enrollment, baseline modified health assessment questionnaire score, CDAI, and cs, b, tsDMARDS use.

## Section 8: Sensitivity analysis: Exclusion of “Other” CVE

This sensitivity analysis excluded “Other” CVE to assess for impact on results. With exclusion of “Other” events, a total of 817 events occurred.

**Appendix eTable 4. Unadjusted and adjusted Hazard Ratios after Exclusion of Other CVE**

| Daily Dose (mg) †       | Unadjusted Hazard Ratio<br>[95% CI] | Adjusted* Hazard Ratio<br>[95% CI] |
|-------------------------|-------------------------------------|------------------------------------|
| none                    | 1 [ref]                             | 1 [ref]                            |
| 1-<5                    | 1.14 [0.63-2.06]                    | 1.01 [0.56-1.84]                   |
| ≥5-9                    | 1.86 [1.36-2.55]                    | 1.65 [1.20-2.27]                   |
| ≥10                     | 2.03 [1.40-3.17]                    | 1.91 [1.22-2.99]                   |
| Cumulative Dose (mg) †  | Unadjusted Hazard Ratio<br>[95% CI] | Adjusted* Hazard Ratio<br>[95% CI] |
| Over Preceding 6-Months |                                     |                                    |
| none                    | 1 [ref]                             | 1 [ref]                            |
| 1-380                   | 0.90 [0.51-1.59]                    | 0.84 [0.47-1.49]                   |
| 381-750                 | 1.23 [0.76-2.00]                    | 1.13 [0.70-1.83]                   |
| 751-1100                | 1.90 [1.34-2.71]                    | 1.69 [1.19-2.41]                   |
| >1110                   | 2.30 [1.51-3.48]                    | 2.16 [1.42-3.29]                   |
| Over Preceding 1-Year   |                                     |                                    |
| none                    | 1 [ref]                             | 1 [ref]                            |
| 1-500                   | 1.02 [0.61-1.70]                    | 0.96 [0.58-1.61]                   |
| 501-1100                | 1.42 [0.95-2.12]                    | 1.32 [0.88-1.97]                   |
| 1101-2100               | 1.73 [1.20-2.50]                    | 1.58 [1.09-2.29]                   |
| >2100                   | 2.09 [1.43-3.07]                    | 1.90 [1.29-2.79]                   |
| Duration of Use (days)  | Unadjusted Hazard Ratio<br>[95% CI] | Adjusted* Hazard Ratio<br>[95% CI] |
| Over Preceding 6-Months |                                     |                                    |
| none                    | 1 [ref]                             | 1 [ref]                            |
| 1-80                    | 0.77 [0.43-1.40]                    | 0.73 [0.40-1.33]                   |
| 81-160                  | 1.63 [1.07-2.47]                    | 1.52 [1.00-2.31]                   |
| 161-181                 | 1.17 [0.38-3.63]                    | 1.10 [0.35-3.42]                   |
| >181                    | 2.04 [1.52-2.74]                    | 1.80 [1.33-2.43]                   |
| Over Preceding 1-Year   |                                     |                                    |
| none                    | 1 [ref]                             | 1 [ref]                            |
| 1-100                   | 1.17 [0.74-1.85]                    | 1.12 [0.70-1.75]                   |
| 101-220                 | 1.42 [0.98-2.07]                    | 1.36 [0.93-1.98]                   |
| 221-360                 | 1.29 [0.77-2.15]                    | 1.16 [0.69-1.94]                   |
| >360                    | 2.38 [1.69-3.37]                    | 2.08 [1.47-2.95]                   |

†, prednisone-equivalents

\*adjusted for age, sex, race, duration of RA, history of CV disease, diabetes mellitus, hyperlipidemia, hypertension, statin use, NSAID use, tobacco use, year of enrollment, baseline modified health assessment questionnaire score, CDAI, and cs, b, tsDMARDS use.
